# Supplementary material for: Antimicrobial Activity of Naturally Occurring Phenols and Derivatives Against Biofilm and Planktonic Bacteria
Source: Front Chem. 2019 Oct 1;7:653. doi: 10.3389/fchem.2019.00653 (PMC6779693; doi:10.3389/fchem.2019.00653)
Supplement: Supplementary file 2 [file Data_Sheet_2.xlsx]

## Sheet: Table 1. 
			MIC (mM)					S. epidermidis (35984)
		Compound	S. epidermidis (35984)	P. aeruginosa (PA01)			Compound	run 1	run 2	run 3	t test
		Thymol (1a)	2.5	3.9			Thymol (1a)	2.5	2.5	1.25	0.0411323
		2-allylthymol (1b)	0.12	0.25			2-allylthymol (1b)	0.12	0.06	0.12
		4-allylthymol (1c)	0.12	0.97			Carvacrol (2a)	2.5	2.5	2.5	0.000292077
		2-methallylthymol (1d)	15	31.2			2-allylcarvacrol (2b)	0.12	0.24	0.12
		2-n-propylthymol (1e)	7.8	15.62			Eugenol (3a)	15	7.8	15	0.0162447
		Carvacrol (2a)	2.5	3.9			Guaiacol (3c)	31.2	31.2	31.2
		2-allylcarvacrol (2b)	0.12	0.25
		4-allylcarvacrol (2c)	0.12	0.97
		2-methallylcarvacrol (2d)	3.9	31.2				P. aeruginosa (PA01)
		2-n-propylcarvacrol (2e)	7.8	15.62			Compound	run 1	run 2	run 3	t test
		Eugenol (3a)	15	31.2			Thymol (1a)	3.9	6	3.9	0.0249308
		ortho-eugenol (3b)	7.8	7.8			2-allylthymol (1b)	0.25	0.25	0.25
		Guaiacol (3c)	31.2	31.2			Carvacrol (2a)	3.9	3.9	3.9	0.000545453
		2-methoxy-4-n-propylphenol (3d)	7.8	15.62			2-allylcarvacrol (2b)	0.25	0.5	0.25
		2-allylphenol (3e)	7.8	7.8			Eugenol (3a)	31.2	31.2	31.2	0.42265
		2-n-propylphenol (3f)	15.62	15.62			Guaiacol (3c)	31.2	62.5	31.2
		2-methallyl-4-methoxyphenol (3g)	62.5	125

## Sheet: Table 2.
		S. epidermidis			P. aeruginosa
	Compound	Mean log reduction		Concentration (mM)	Mean log reduction.	Concentrations (mM)
	thymol (1a)	1.9	7.8		1.2	30
	2-allylthymol (1b)	5.1	7.8		5	30
	carvacrol (2a)	0.09	1.7		0.37	15.6
	2-allylcarvacrol (2b)	5.1	1.7		5	15.6
	eugenol (3a)	5.2	1.7		5.1	15.6
	ortho-eugenol (3b)	2.6	1.7		2.1	15.6
	guaiacol (3c)	0.13	1.7		0.1	15.6
		S. epidermidis			P. aeruginosa			S. epidermidis	P. aeruginosa
		mean log 10 cfu after 5 h			mean log 10 cfu after 5 h			mean log reduction	mean log reduction
	control		6.41		6.35
	thymol		4.49		5.34			1.92	1.19
	control		6.45		6.23
	2-allyl thymol		1.39		1.26			5.19	4.97
	control		6.48		6.68
	carvacrol		6.39		6.31			0.09	0.37
	control		6.46		6.27
	2-allyl carvacrol		1.33		1.23			5.13	5.04
	control		6.45		6.51
	eugenol		1.26368		1.38			5.18632	5.13
	control		5.54		6.51
	ortho eugenol		2.9		4.37			2.64	2.14
	control		6.23		6.41
	guaiacol		6.19		6.31			0.13	0.1

## Sheet: Table 3.
			BEC (mM)					S. epidermidis (35984)
		Compound		S. epidermidis	P. aeruginosa		Compound	run 1	run 2	run 3	t test
		thymol (1a)		3.9	15		Thymol (1a)	3.9	3.9	6	0.0219192
		2-allylthymol (1b)		9.25	31.25		2-allylthymol (1b)	9.25	9.25	9.25
		4-allylthymol (1c)		6.5	13		Carvacrol (2a)	1.95	3.9	1.95	0.00941919
		2-n-propylthymol (1e)		31.25	62.5		2-allylcarvacrol (2b)	9.25	9.25	9.25
		carvacrol (2a)		1.95	7.5		Eugenol (3a)	31.25	31.25	31.25	0.00274754
		2-allylcarvacrol (2b)		9.25	31.25		guaiacol (3c)	7.8	3.9	7.8
		4-allylcarvacrol (2c)		3.25	7.5
		2-n-propylcarvacrol (2e)		31.25	62.5
		eugenol (3a)		31.25	62.5			P. aeruginosa (PA01)
		ortho-eugenol (3b)		31.25	31.25		Compound	run 1	run 2	run 3	t test
		guaiacol (3c)		7.8	15.6		Thymol (1a)	15.6	7.8	15.6	0.0196988
		2-methoxy-4-n-propylphenol (3d)		31.25	31.25		2-allylthymol (1b)	31.25	31.25	31.25
							Carvacrol (2a)	7.5	3.9	7.5	0.00230525
							2-allylcarvacrol (2b)	31.25	31.25	31.25
							Eugenol (3a)	62.5	62.5	62.5	0.0153039
							guaiacol (3c)	15.6	15.6	31.25

## Sheet: Table 4.
Experiment	Thymol Efficacy Test		Drop plate:
Run By	MM		Volume Plated =		0.01	mL
Experiment Dates	06/12/18-06/14/18		Total Volume =		40	mL
Organism	P. aeruginosa 15442		Coupon Surface Area =		4.05	cm2
Flow Rate	11.25 mL/min
Coupon Type	Polycarbonate
RPM	125
Room Temperature	21.8-22.8 C
Inoculation Media	300 mg/L TSB
Batch Media	300 mg/L TSB
Continuous Flow Media	100 mg/L TSB				Counts for cells in yellow done across two different dilutions, used different equation
Disaggregation Method	Vortex/Sonicate
Treatment	Thymol variations
Contact Time	1 hour
Neutralizer	1X DE
INNOCULUM
Sample	Plate	Dilutions 10x	Counts for each drop, 5 drops per plate					Avg CFU	CFU/mL	log10CFU/mL
Inoculum	1	6	4	7	5	4	3	4.2	420000000	8.62325
	2		2	5	3	7	2
INITIAL CONTROL COUNTS
Coupon	Plate	Dilution 10X	Counts for each drop, 5 drops per plate					Avg CFU	CFU/cm2	log10 CFU/cm2
1	1	4	22	15	32	25	22	21.5	2.12346e+08	8.32704
	2		23	14	23	19	20
2	1	5	2	2	5	3	2	2.6	2.5679e+08	8.40958
	2		3	3	3	2	1
DMSO CONTROL
Coupon	Plate	Dilution 10X	Counts for each drop, 5 drops per plate					Avg CFU	CFU/cm2	log10 CFU/cm2
1	1	4	21	18	27	13	19	20	1.97531e+08	8.29563
	2		19	23	20	15	25
2	1	4	24	24	14	26	22	23.4	2.31111e+08	8.36382
	2		25	23	23	22	31
3	1	4	10	22	15	18	19	18	1.77778e+08	8.24988
	2		19	19	16	20	22
THYMOL
Coupon	Plate	Dilution 10X	Counts for each drop, 5 drops per plate					Avg CFU	CFU/cm2	log10 CFU/cm2
1	1	1	1	3	4	1	2	2.4	23703.7	4.37482
	2		1	4	4	2	2
2	1	0	31	30	28	27	22	27.6	27833.9	4.44457
	2	1	3	4	1	3	6	3.4
3	1	1	3	3	4	2	5	3.8	37530.9	4.57439
	2		6	4	2	4	5
A-THYMOL
Coupon	Plate	Dilution 10X	Counts for each drop, 5 drops per plate					Avg CFU	CFU/cm2	log10 CFU/cm2
1	1	4	9	17	15	15	19	15.6	1.54074e+08	8.18773
	2		18	16	17	15	15
2	1	4	39	38	36	30	28	34.2	3.42985e+08	8.53528
	2	5	2	3	6	4	5	4
3	1	5	3	1	3	4	6	2.9	2.8642e+08	8.457
	2		1	1	5	2	3
P-THYMOL
Coupon	Plate	Dilution 10X	Counts for each drop, 5 drops per plate					Avg CFU	CFU/cm2	log10 CFU/cm2
1	1	4	10	10	7	5	9	9.5	9.38272e+07	7.97233
	2		6	13	8	17	10
2	1	4	21	19	18	17	8	16.5	1.62963e+08	8.21209
	2		13	14	15	22	18
3	1	4	11	14	10	9	26	13.3	1.31358e+08	8.11846
	2		10	10	14	14	15
Summary:
		Initial Count Control	DMSO Control	Thymol	Allyl-Thymol	Propyl-Thymol
	Mean Log10CFU/cm2	8.36831	8.30311	4.46459	8.39334	8.10096
	Standard deviation	0.058361	0.0573384	0.101281	0.182311	0.120834
	Mean Log Reduction (DMSO - Treatment)			3.83852	-0.090225	0.202153

## Sheet: Figure 2 S. epidermidis
		Eugenol at 30mM		log 10 CFU
			hr	run 1	run2	run 3	mean	Standard Deviation
			0	6.42651	6.36	6.59	6.45884	0.118358
			1	6.66	6.29885	6.13	6.36295	0.270752
			2	6.03	6.14301	6.36	6.17767	0.167708
			3	5.77085	5.51	6.12	5.80028	0.306063
			4	1.31	1.16	1.63	1.36667	0.240069
			5	1.03	1.30103	1.46	1.26368	0.21742
		ortho eugenol at 30mM		log 10 CFU
			hr	run 1	run2	run 3	mean	Standard Deviation
			0	6.29667	6.61	6.26	6.38889	0.192364
			1	6.23	6.1	6.14301	6.15767	0.0662278
			2	6.07918	6.13	5.89	6.03306	0.126473
			3	5.86	5.90309	5.99	5.9177	0.0662195
			4	2.36	2.90309	2.81	2.69103	0.290434
			5	1.26	1.36	1.03	1.21667	0.169214
		guaiacol at 30mM		log 10 CFU
			hr	run 1	run2	run 3	mean	Standard Deviation
			0	6.13	6.35411	6.32	6.26804	0.120753
			1	6.76	6.99	6.16	6.63667	0.428525
			2	6.34439	6.1	6.45	6.29813	0.179527
			3	6.03	6.12	6.69	6.28	0.357911
			4	6.37	5.87	6.51	6.25	0.336452
			5	6.11	6.43	6.03	6.19	0.21166
		control		log 10 CFU
			hr	run 1	run2	run 3	mean	Standard Deviation
			0	6.47276	6.4843	6.5	6.48569	0.0136745
			1	6.4843	6.46	6.51	6.48477	0.0250033
			2	6.4609	6.44716	6.9	6.60269	0.257574
			3	6.48855	6.31	6.29	6.36285	0.109318
			4	6.1	6.69	6.45	6.41333	0.296704
			5	6.47567	6.06	6.67	6.40189	0.311621
		carvacrol at 1.7 mM		log 10 CFU
			hr	run 1	run2	run 3	mean	Standard Deviation
			0	6.50379	6.39	6.46	6.45126	0.0573962
			1	6.41	6.48572	6.46	6.45191	0.038504
			2	6.4624	6.46538	6.31	6.41259	0.0888612
			3	6.43	6.45332	6.56	6.48111	0.0693118
			4	6.45	6.40824	6.39	6.41608	0.0307587
			5	6.47567	6.30103	6.39794	6.39155	0.0874959
		2-allyl carvacrol at 1.7 mM		log 10 CFU
			hr	run 1	run2	run 3	mean	Standard Deviation
			0	6.33	6.49	6.44167	6.42056	0.0820632
			1	6.26	6.29494	6.31	6.28831	0.0256501
			2	5.19776	5.31	5.18	5.22925	0.0704898
			3	2.31	2.78081	2.82	2.63694	0.283812
			4	2.75	3.01	2.92313	2.89438	0.132363
			5	1.58	1.32	1.09	1.33	0.245153
		control		log 10 CFU
			hr	run 1	run2	run 3	mean	Standard Deviation
			0	6.32222	6.44871	6.5	6.42364	0.0915023
			1	6.44716	6.31	6.51	6.42239	0.102275
			2	6.30103	6.46389	6.39	6.38497	0.0815477
			3	6.44716	6.30103	6.29	6.34606	0.0877247
			4	6.69	6.2	6.45	6.44667	0.245017
			5	6.32	6.4624	6.76	6.51413	0.224516
		thymol at 7.8		log 10 CFU
			hr	run 1	run2	run 3	mean	Standard Deviation
			0	6.56	6.47857	6.21	6.41619	0.183148
			1	6.51322	6.68	6.13	6.44107	0.282008
			2	6.41996	6.35	6.4624	6.41078	0.0567575
			3	6.03	6.17609	6.31	6.17203	0.140044
			4	5.6902	5.60206	5.39794	5.5634	0.149915
			5	4.47712	4.31	4.69	4.49237	0.190459
		2-allyl thymol at 7.8		log 10 CFU
			hr	run 1	run2	run 3	mean	Standard Deviation
			0	6.48714	6.59106	6.21	6.4294	0.196984
			1	6.49346	6.88	6.46	6.61115	0.233429
			2	6.17609	6.02	6.39	6.19536	0.185751
			3	3.30103	3.71	3.13	3.38034	0.298023
			4	1.47712	1.89	1.52	1.62904	0.227012
			5	1.03	1.47712	1.65	1.38571	0.319949
		control		log 10 CFU
			hr	run 1	run2	run 3	mean	Standard Deviation
			0	6.47276	6.59218	6.4624	6.50911	0.0721238
			1	6.4843	6.4843	6.31	6.4262	0.100632
			2	6.4609	6.59106	6.44716	6.49971	0.0794159
			3	6.48855	6.69	6.5	6.55952	0.113147
			4	6.44871	6.79	6.31	6.51624	0.247023
			5	6.47567	6.54	6.2	6.40522	0.180616

## Sheet: Figure 2 P. aeruginosa
	Eugenol at 30mM		log 10 CFU
		hr	run 1	run2	run 3	mean	Standard Deviation
		0	6.37658	6.408	6.37658	6.38705	0.0181421
		1	6.25042	6.5	6.1	6.28347	0.202038
		2	5.50515	5.3	4.8	5.20172	0.362704
		3	4.38021	4.56	4.31	4.41674	0.12894
		4	3.25527	3.6	3.16	3.33842	0.231486
		5	1.21	1.62	1.30103	1.37701	0.215301
	ortho eugenol at 30mM		log 10 CFU
		hr	run 1	run2	run 3	mean	Standard Deviation
		0	6.40824	6.13	6.39	6.30941	0.155644
		1	6.3	6.36922	6.44	6.36974	0.0700015
		2	6.61	6.30963	6.11	6.34321	0.251686
		3	5.56	5.98227	6.09	5.87742	0.280125
		4	5.78	5.60206	5.28	5.55402	0.253438
		5	4.30103	4.19	4.62	4.37034	0.223222
	guaiacol at 30mM		log 10 CFU
		hr	run 1	run2	run 3	mean	Standard Deviation
		0	6.40824	6.01	6.48	6.29941	0.253194
		1	6.31	6.4	6.36922	6.35974	0.0457424
		2	6.01	6.69	6.30963	6.33654	0.340798
		3	6.31	6.35025	6.51	6.39008	0.105783
		4	6.33846	6.56	6.09	6.32949	0.235128
		5	6.03	6.30963	6.58	6.30654	0.275013
	control		log 10 CFU
		hr	run 1	run2	run 3	mean	Standard Deviation
		0	6.45	6.4843	6.5	6.4781	0.0255701
		1	6.48714	6.46	6.51	6.48571	0.0250305
		2	6.31	6.44716	6.9	6.55239	0.308755
		3	6.43933	6.31	6.29	6.34644	0.0810629
		4	6.9	6.49136	6.45	6.61379	0.248729
		5	6.41162	6.13	6.49	6.34387	0.18932
	Carvacrol at 15.6 mM		log 10 CFU
		hr	run 1	run2	run 3	mean	Standard Deviation
		0	6.38382	6.02	6.40824	6.27069	0.217443
		1	6.37291	6.41	6.28	6.3543	0.0669679
		2	6.02	6.33846	6.36	6.23949	0.190385
		3	6.16	6.56	6.32222	6.34741	0.201186
		4	6.39	6.15	6.41	6.31667	0.144684
		5	6.0086	6.59	6.34635	6.31498	0.291966
	2-allyl carvacol at 15.6 mM		log 10 CFU
		hr	run 1	run2	run 3	mean	Standard Deviation
		0	6.13	6.38382	6.46	6.32461	0.172784
		1	6.39	6.15229	6.18	6.24076	0.129984
		2	5.94	5.9	5.78	5.87333	0.0832666
		3	4.31	4.50515	4.46	4.42505	0.102162
		4	3.2	3	2.98	3.06	0.121655
		5	1.39	1.30103	1.01	1.23368	0.198752
	control		log 10 CFU
		hr	run 1	run2	run 3	mean	Standard Deviation
		0	6.39445	6.4843	6.5	6.45958	0.0569497
		1	6.40824	6.46	6.51	6.45941	0.0508826
		2	6.37658	6.44716	6.9	6.57458	0.284024
		3	6.46	6.31	6.16	6.31	0.15
		4	6.39094	6.26	6.45	6.36698	0.0972391
		5	6.38021	6.13	6.21	6.24007	0.127787
	thymol at 30 mM		log 10 CFU
		hr	run 1	run2	run 3	mean	Standard Deviation
		0	6.41162	6.4843	6.5	6.46531	0.0471522
		1	6.37291	6.46	6.51	6.44764	0.0693751
		2	6.38382	6.44716	6.9	6.57699	0.281521
		3	6.33846	6.31	6.16	6.26949	0.0958788
		4	6.04922	6.26	6.45	6.25307	0.200481
		5	5.12	5.29	5.62	5.34333	0.254231
	2-allyl thymol at 30 mM		log 10 CFU
		hr	run 1	run2	run 3	mean	Standard Deviation
		0	6.36549	6.23	6.54	6.3785	0.155409
		1	6.26007	6.39	6.13	6.26002	0.13
		2	6.1271	5.89	6.18	6.0657	0.154443
		3	6.1	6.0086	6.23	6.11287	0.111259
		4	4.16	4.21	4.67	4.34667	0.281129
		5	1.30103	1.03	1.46	1.26368	0.21742
	control		log 10 CFU
		hr	run 1	run2	run 3	mean	Standard Deviation
		0	6.2	6.36549	6.40824	6.32458	0.109983
		1	6.4014	6.34242	6.3	6.34794	0.050925
		2	6.11	6.35411	6.49	6.31804	0.192551
		3	6.51	6.33445	6.3	6.38148	0.112623
		4	6.29	6.39	6.46	6.38	0.08544
		5	6.01	6.33445	6.34635	6.23027	0.190851
